# Supplementary material
Source: Royal Society of Chemistry journal article supplement (doi:10.1039/d6ta02784a)
Supplement: d6ta02784a1.pdf [file d6ta02784a1.pdf]

**Soft-Chemical Scalable One-pot Aqueous-medium Synthesis of Na<sub>3</sub>(VO)<sub>2</sub>(PO<sub>4</sub>)<sub>2</sub>F-Based  
Cathodes: Compositional Tuning and Electrochemical Performance in Na- and Li-Ion  
Batteries**

Prashanth Sandineni,<sup>a,§</sup> Subal Chandra Manna,<sup>a,§,1</sup> Sutapa Bhattacharya,<sup>a</sup> Santhoshkumar Sundaramoorthy,<sup>a</sup> Ramesh Deokate,<sup>a,2</sup> Milad Aghayi-Anaraki,<sup>a</sup> George E. Sterbinsky,<sup>b</sup> Kartik Ghosh,<sup>c</sup> and Amitava Choudhury<sup>a,\*</sup>

<sup>a</sup>Department of Chemistry, Missouri University of Science and Technology, Rolla, MO 65409, USA.

<sup>b</sup>Advanced Photon Source, Argonne National Laboratory, Argonne, IL, 60439, USA

<sup>c</sup>Department of Physics, Astronomy and Materials Science and Center for Applied Science and Engineering, Missouri State University, Springfield, Missouri 65897, USA.

<sup>§</sup> Contributed equally

\* Corresponding author, e-mail: choudhurya@mst.edu

---

<sup>1</sup> Current Address: Department of Chemistry and Chemical Technology, Vidyasagar University, Midnapore 721102, West Bengal, India

<sup>2</sup> Current Address: Department of Physics, Vidya Pratishthan's, Art Science & Commerce College, Baramati, Dist.- Pune, India – 413 113.

### **Solution preparation for ICP-OES and Ion-chromatographic analysis**

ICP analysis for Na was performed on Perkin Elmer AVIO 200 ICP-OES. The samples, **I-IV** were digested overnight in hydrothermal bombs in 1% ultra-high pure ICP grade HNO<sub>3</sub>. The sample solution was then diluted to 15 ppm strength for the measurements. The standard solution for Na was tested at various strengths, 0.1 0.5, 1, 5 and 10 ppm, before performing the analysis for samples.

Ion Chromatography for the analysis of fluoride was carried out in a Thermofisher INUVION - Ion Chromatography. The samples digested in 1% ICP grade HNO<sub>3</sub>. Then the solution was diluted to 15 ppm using Milli-Q water for the analysis. The instrument was calibrated at various low concentrations (0.3125, 0.625, 1.25, 2.5, 5 and 10 ppm) of known fluoride standard solutions.

### **Post-mortem XRD analysis of the Na- and Li-ion cells**

Na- and Li-ion coin cells were disassembled inside the Ar-filled glovebox after they have been charged or discharged to the designated potential. The cathode composite was then washed with acetonitrile and dried in vacuum in the antechamber. The dried cathode composite was then loaded on a air-tight cell for laboratory powder X-ray diffraction.

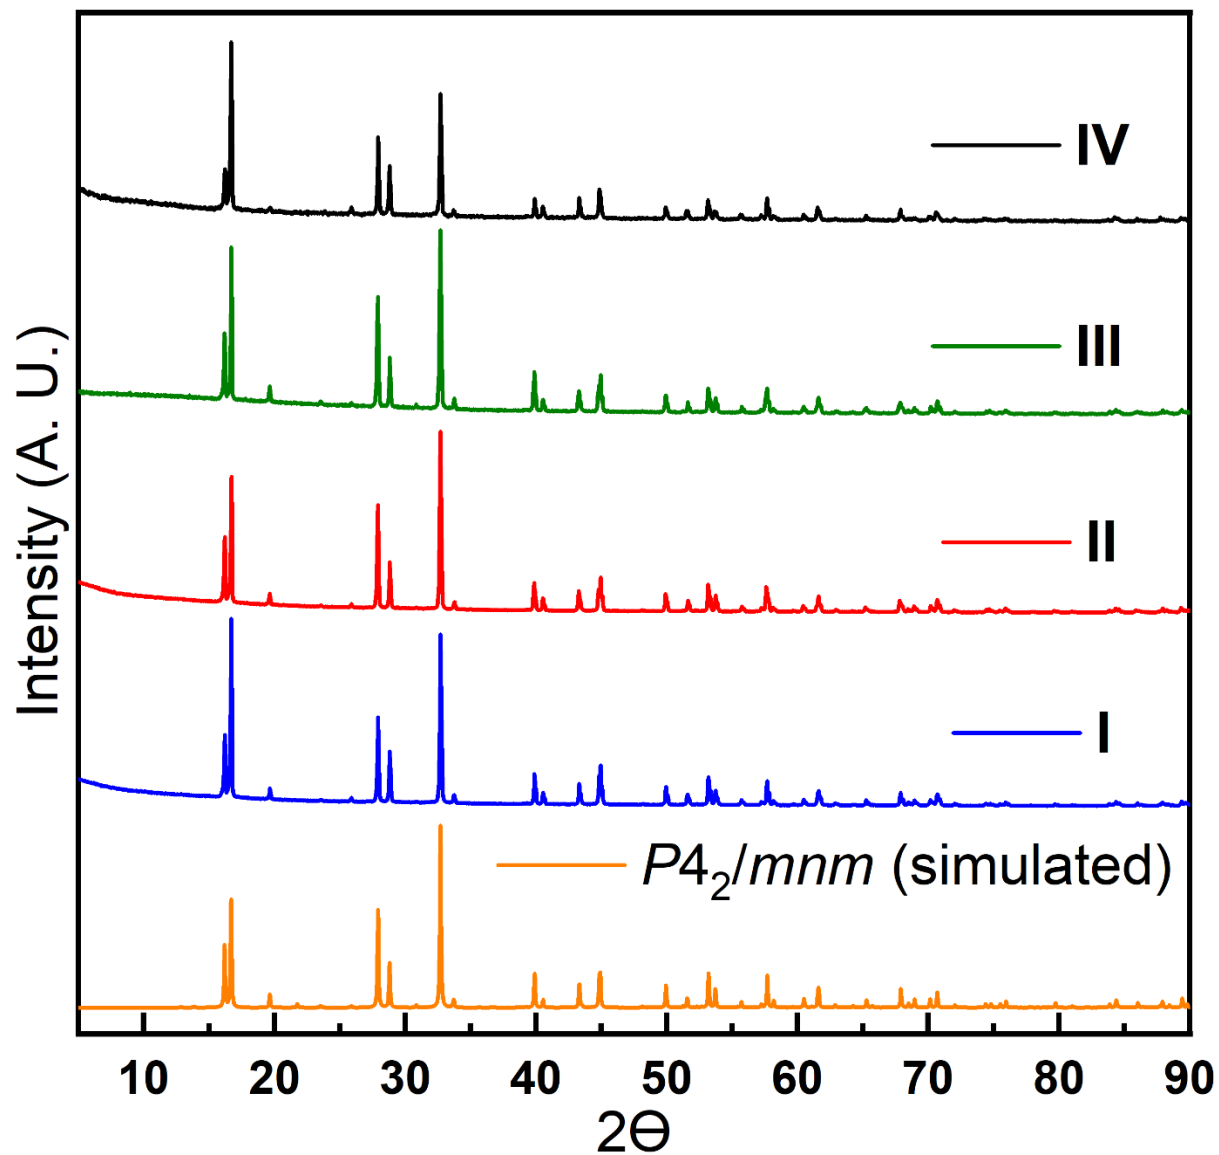

**Fig. S1.** The laboratory PXRD ( $\text{Cu } K_{\alpha 1,2}$  ( $\lambda$ ) = 1.54059 Å) of I – IV, plotted over the simulated pattern of I solved in  $P4_2/mnm$  space group. The stack plot shows very good matching of the experimental patterns with theoretical pattern indicating purity of bulk phase.

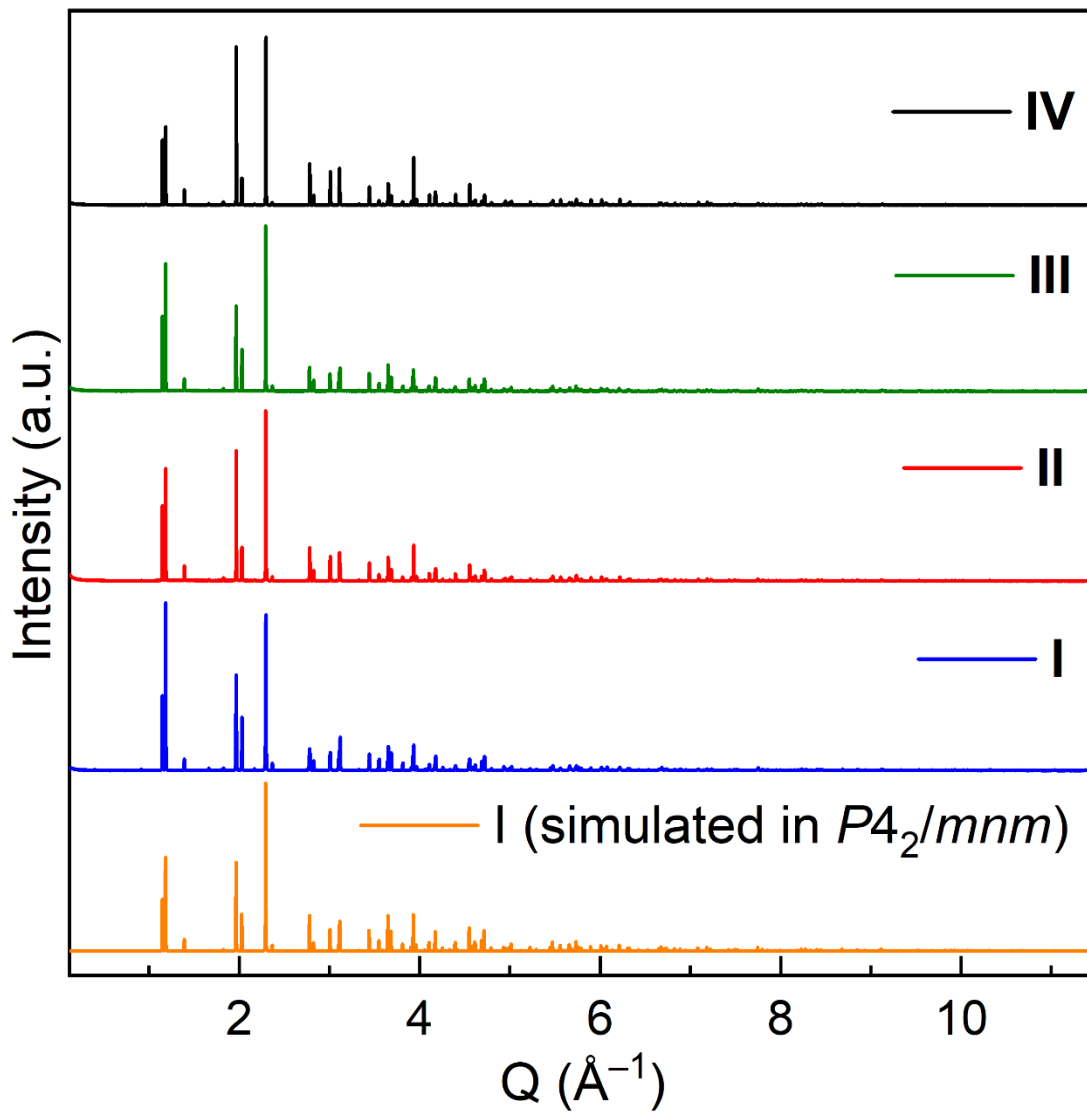

**Fig. S2.** The synchrotron PXRD ( $\lambda = 0.457902$  Å for **I**,  $0.457867$  Å for **II**,  $0.459727$  Å for **III**,  $0.412834$  Å for **IV**) of **I** – **IV**, plotted in terms of  $Q$  space (Å<sup>-1</sup>) showing excellent matching with the simulated pattern of **I** in *P*<sub>4</sub><sub>2</sub>/*mnm* space group. Absence of any additional line proves the bulk purity of the products.

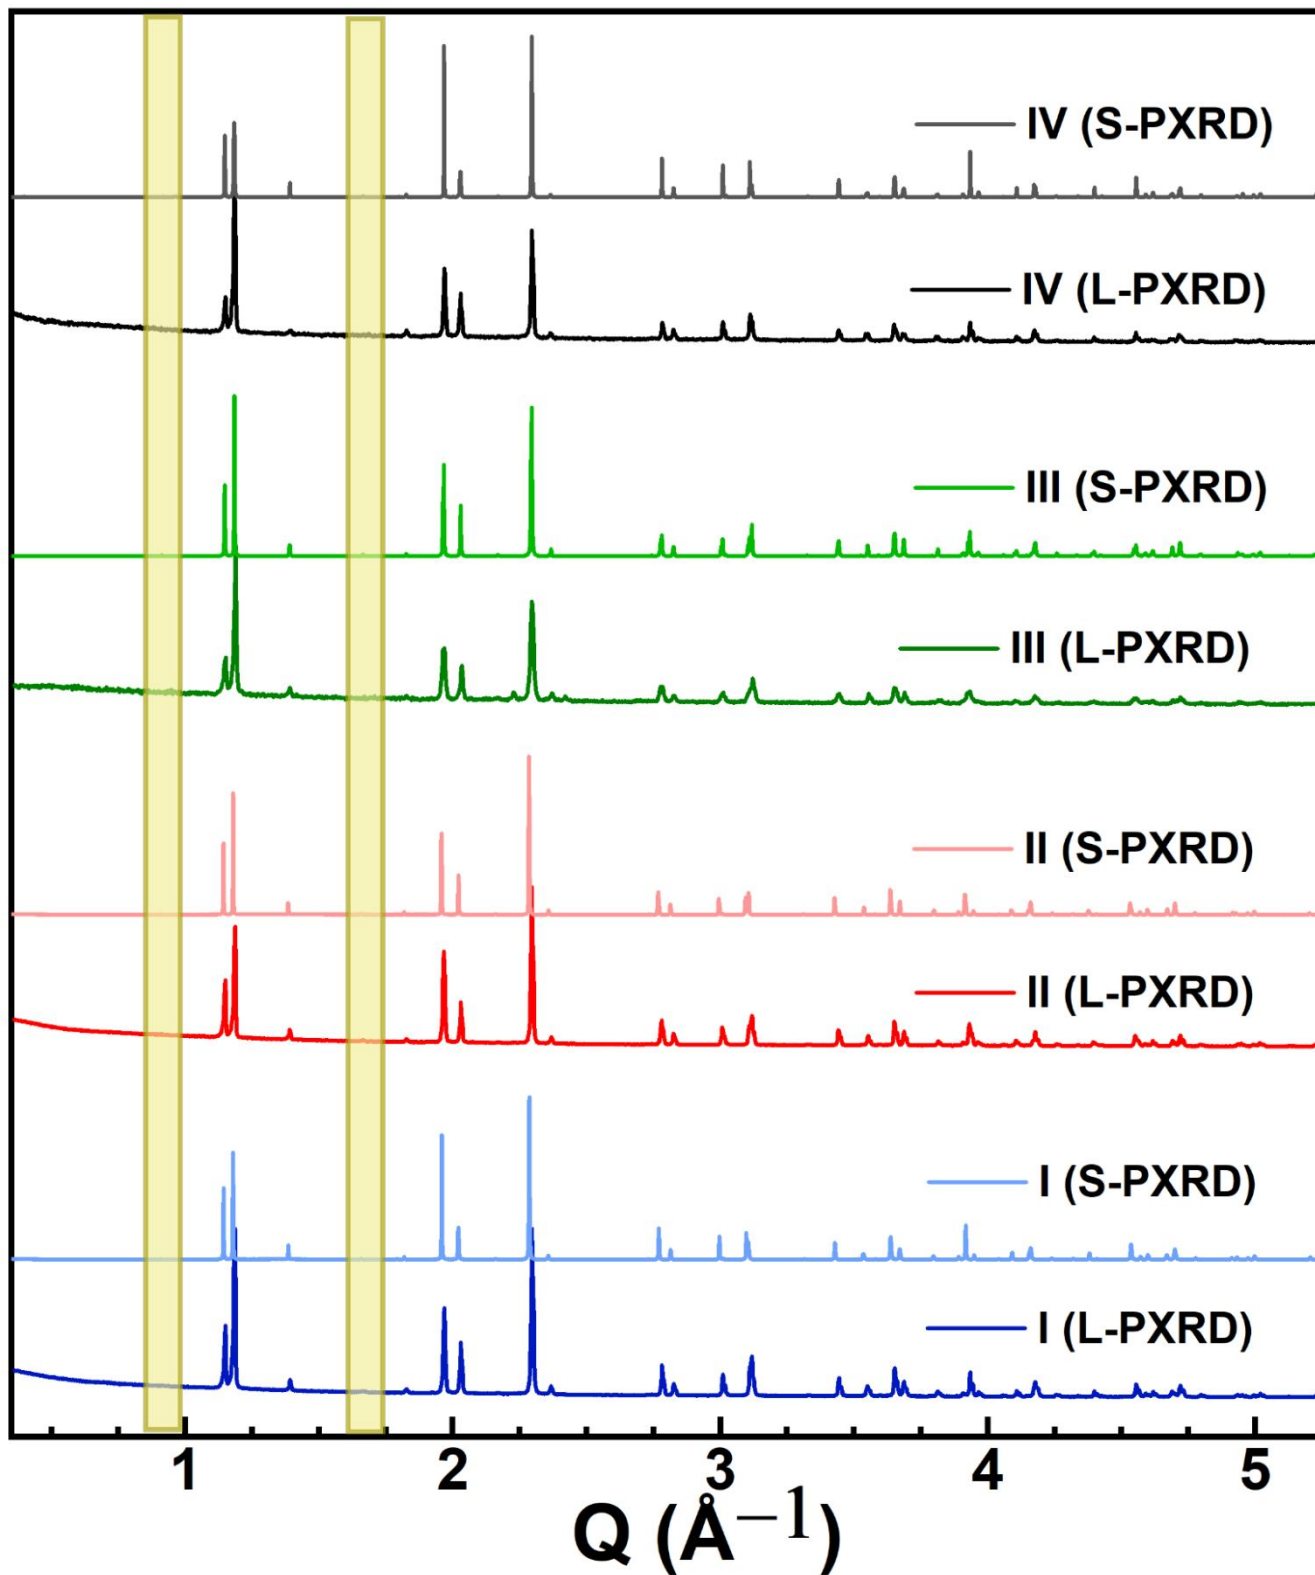

**Fig. S3.** A one-to-one comparison of the synchrotron ( $\lambda \sim 0.4578 \text{\AA}$ ) and laboratory PXR D ( $\lambda_{\text{Cu K}\alpha 1,2} = 1.54059 \text{\AA}$ ) of I – IV, plotted in terms of  $Q$  vector ( $\text{\AA}^{-1}$ ) for consistency. The highlighted sections are zoomed in in Figure S4 to show the difference.

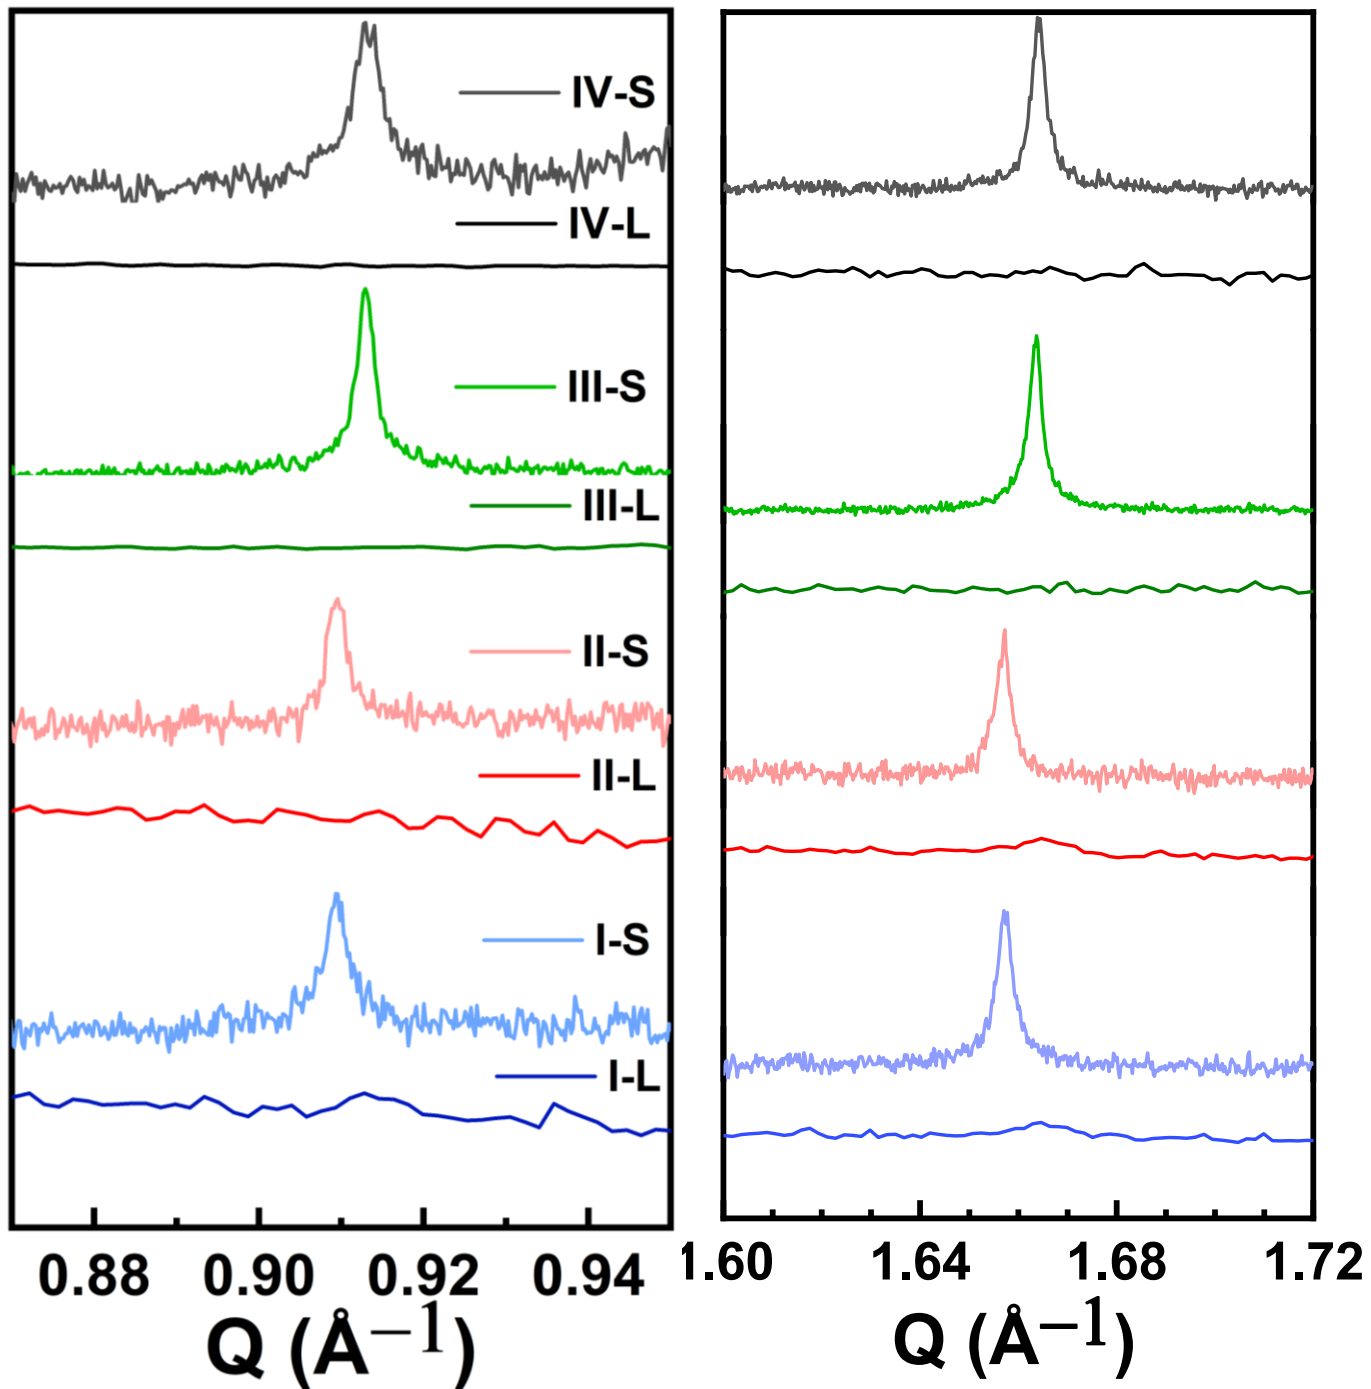

**Fig. S4.** A close-up view of sections of synchrotron PXRD and lab-PXRD of I – IV, plotted in terms of Q vectors ( $\text{\AA}^{-1}$ ) showing the presence of lines at  $Q = 0.9135 \text{ \AA}^{-1}$  ( $d = 6.884 \text{ \AA}$ ) and  $Q = 1.662 \text{ \AA}^{-1}$  ( $d = 3.779 \text{ \AA}$ ) for (101) and (211) diffraction lines, respectively, only in the synchrotron pattern but flat line in lab-data.

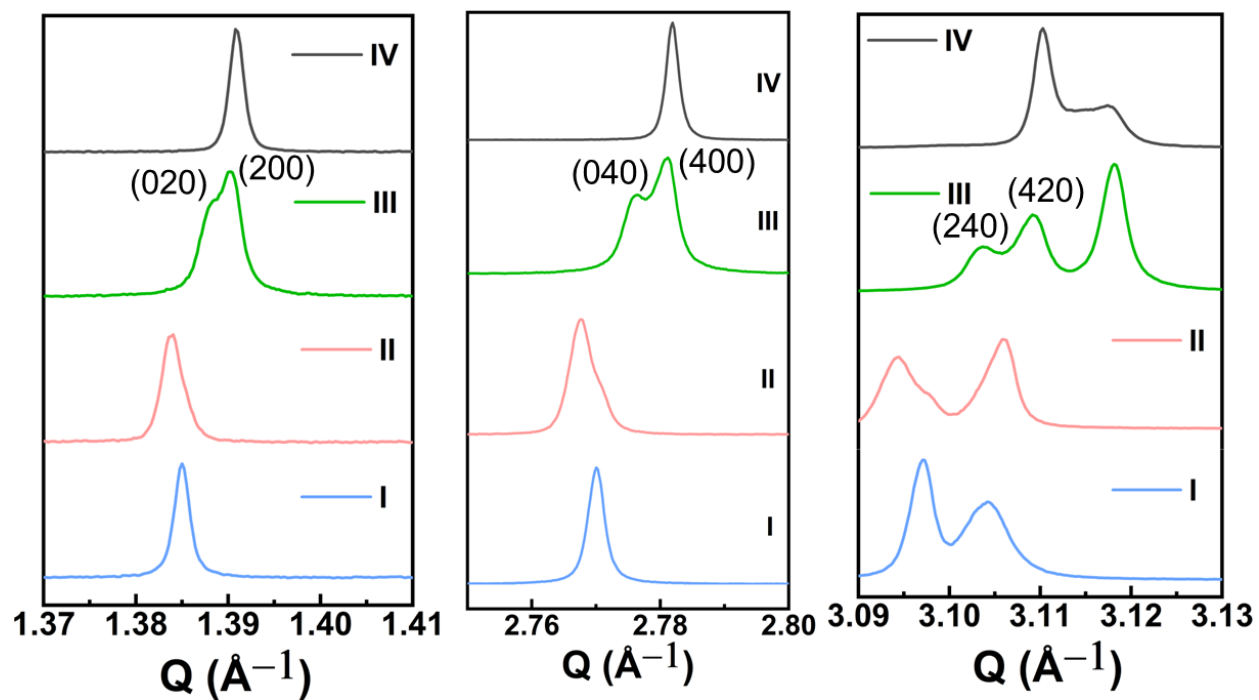

**Fig. S5.** Sections of the synchrotron PXRD plots showing the distortion in **III** at  $d = 4.519 \text{ \AA}/Q = 1.3905 \text{ \AA}^{-1}$  (200) line,  $d = 2.259 \text{ \AA}/Q = 2.78 \text{ \AA}^{-1}$  (400) line, or  $d = 2.0207 \text{ \AA}/Q = 3.1093 \text{ \AA}^{-1}$  (420) line through the stack plot of **I-IV**.

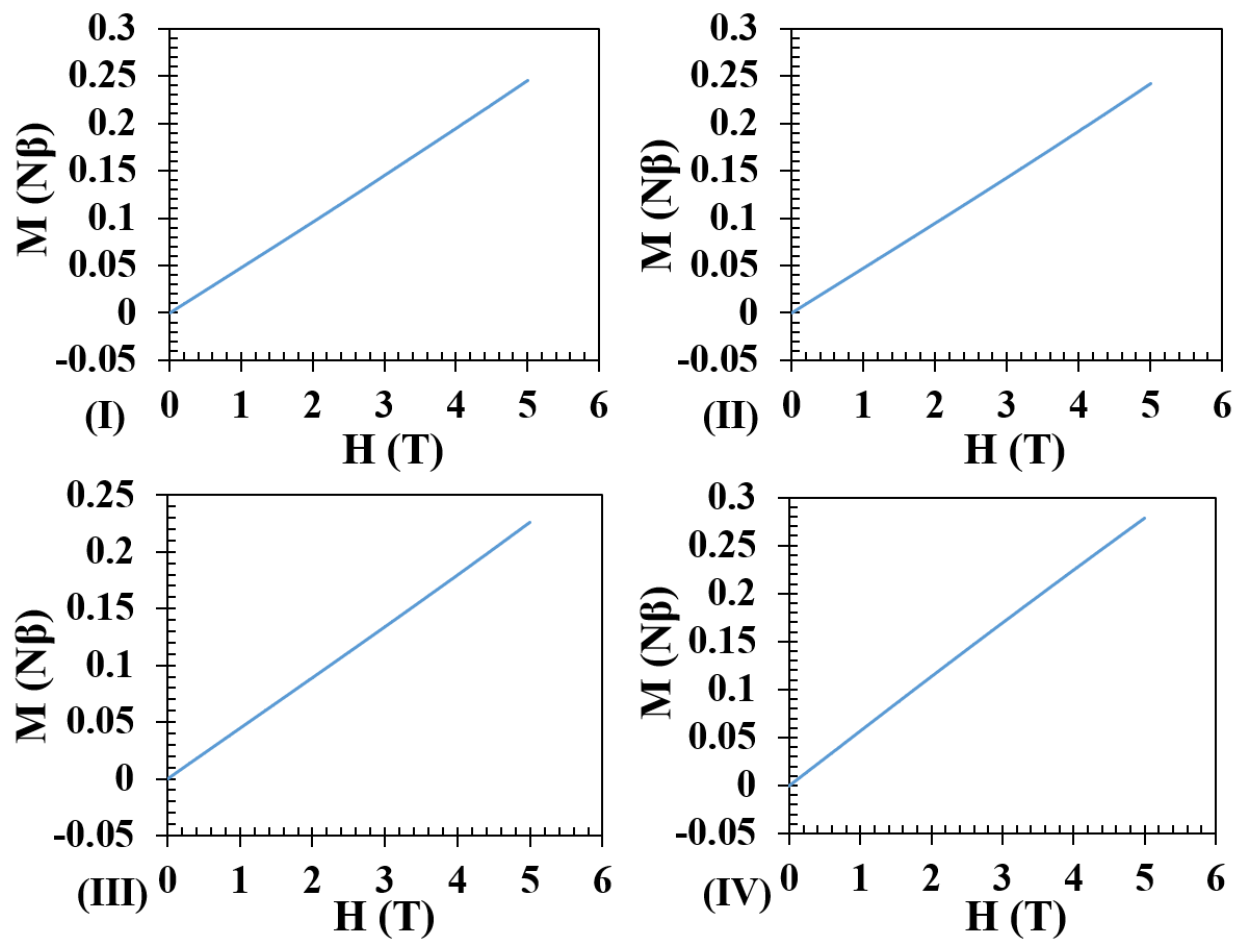

Fig. S6.  $M$  vs  $H$  plots of four compounds, I – IV, at 5K.

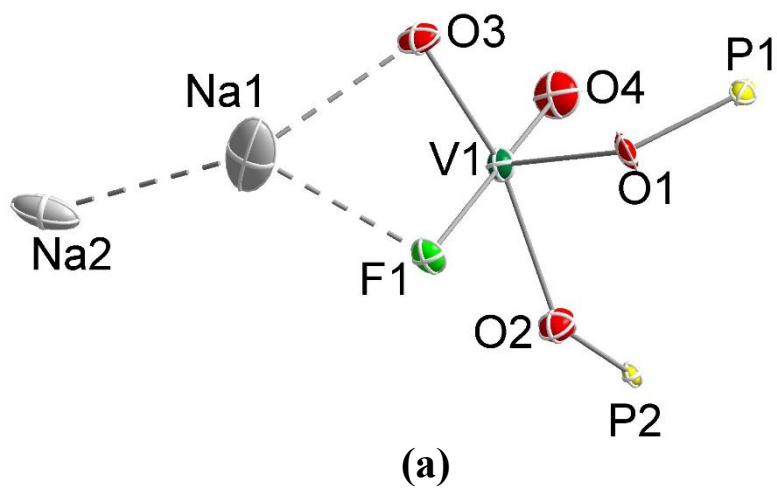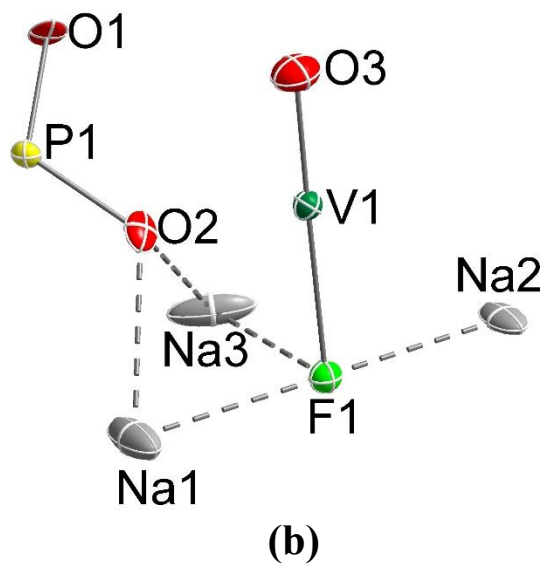

**Fig. S7.** Asymmetric unit of **I**, **II** and **IV** in  $P4_2/mnm$  (a) compared with the asymmetric unit of **III** crystallized in  $Amam$  space group (b).

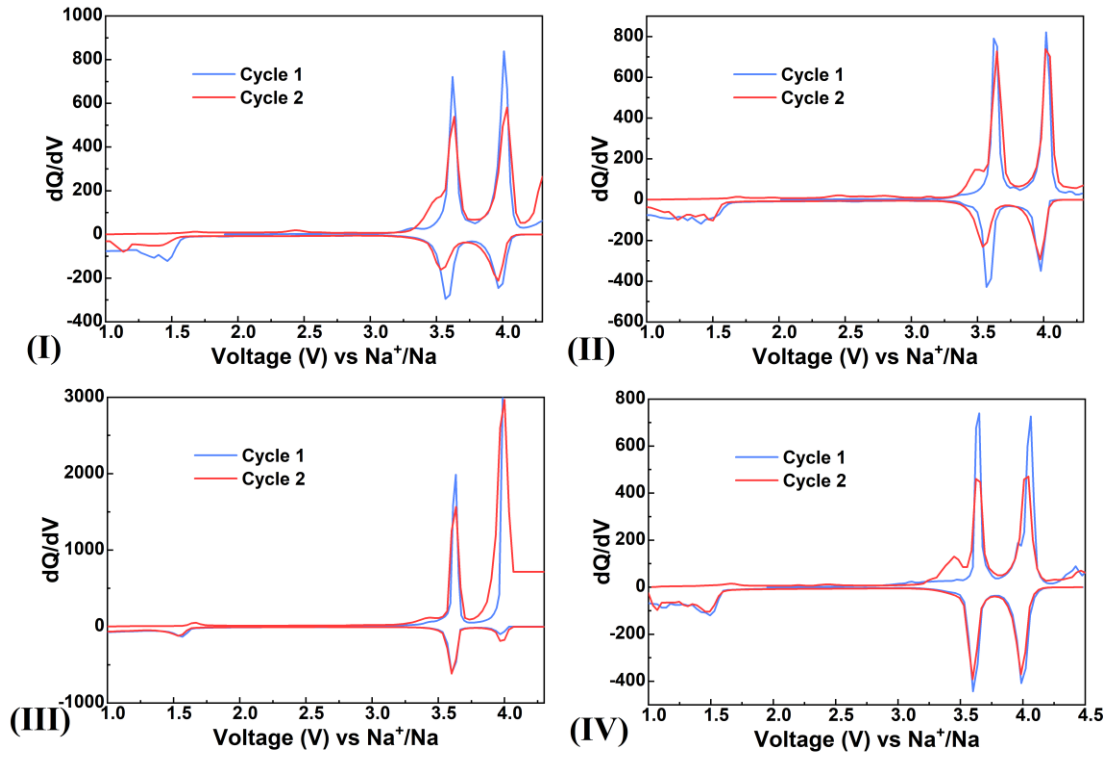

**Fig. S8.**  $dQ/dV$  curves for the first two cycles of charge-discharge at  $C/50$  rate for **I – IV** in Na-ion batteries cycled between 1 – 4.5 V.

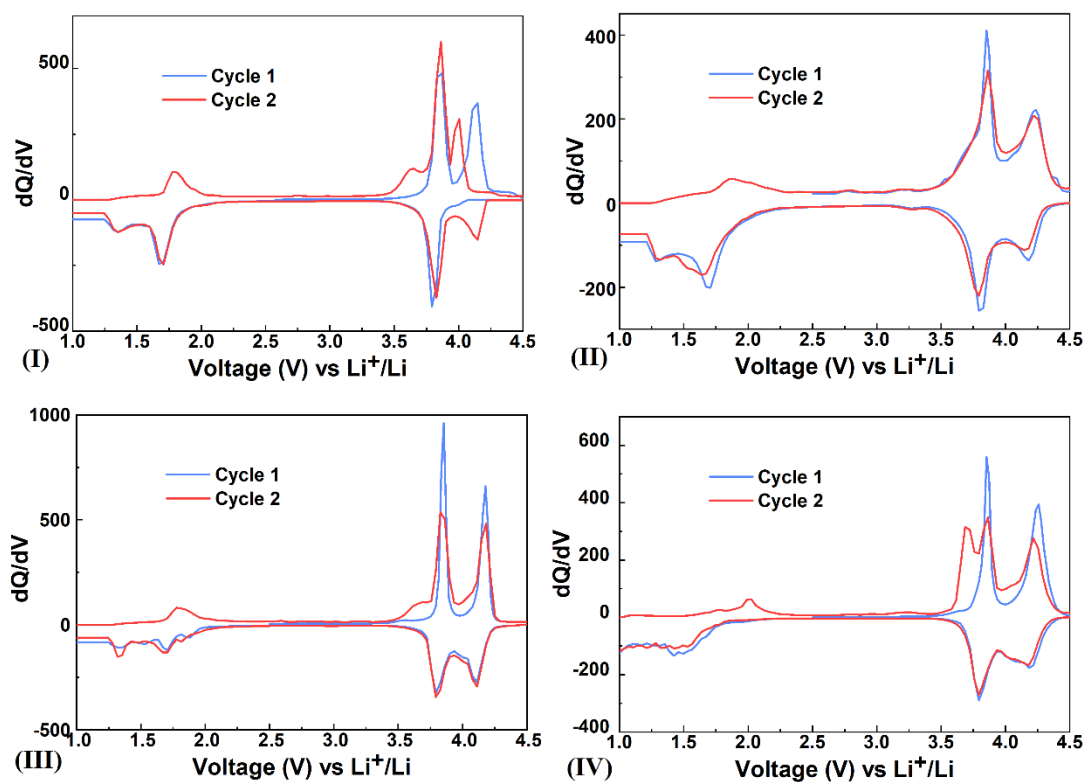

**Fig. S9.**  $dQ/dV$  curves for the first two cycles of charge-discharge at  $C/50$  rate for **I – IV** in Li-ion batteries cycled between 1 – 4.5 V.

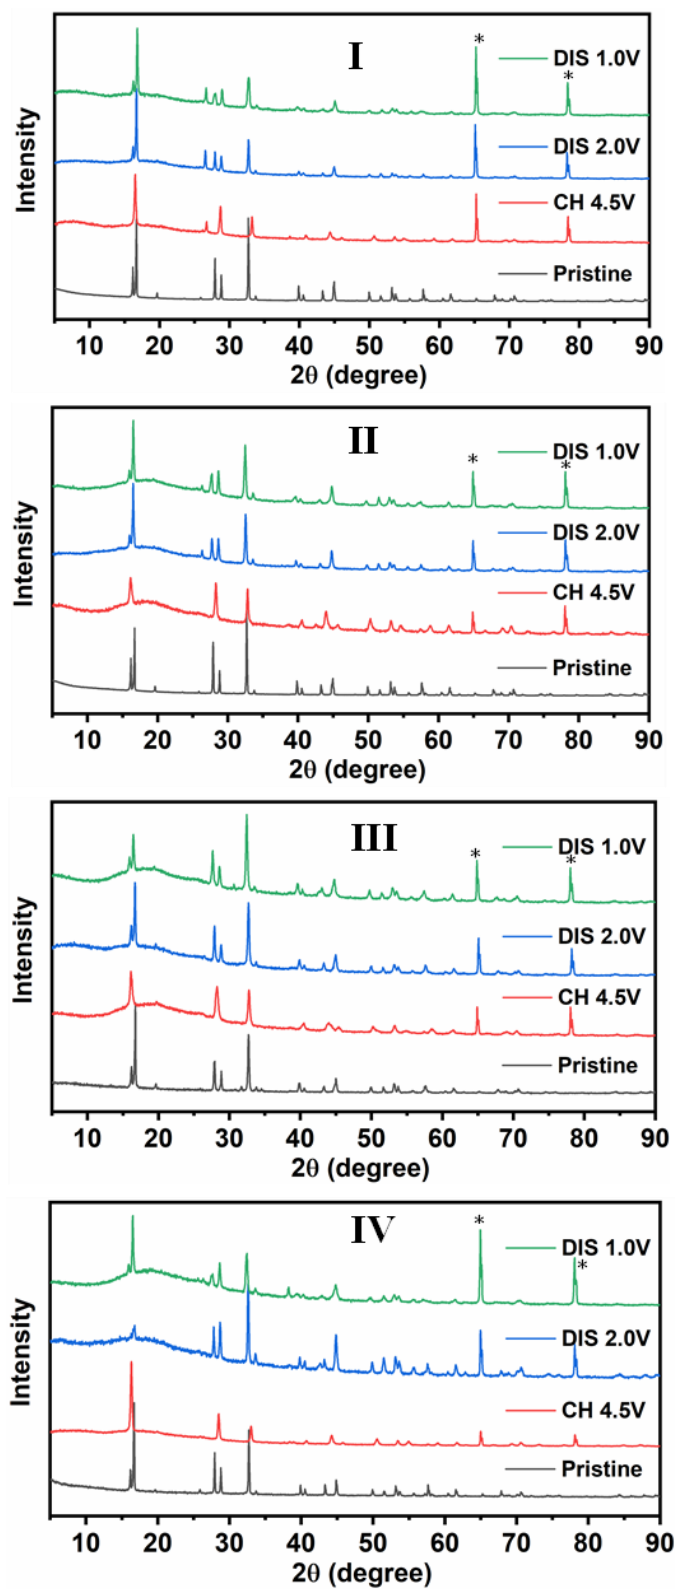

**Fig. S10.** PXRDs of the cathodes made of compounds, **I** – **IV**, recovered at different state of charge and discharge with respect to  $\text{Na}^+/\text{Na}$  in a Na-ion battery. The asterisks indicate diffraction lines from the Al-current collector.

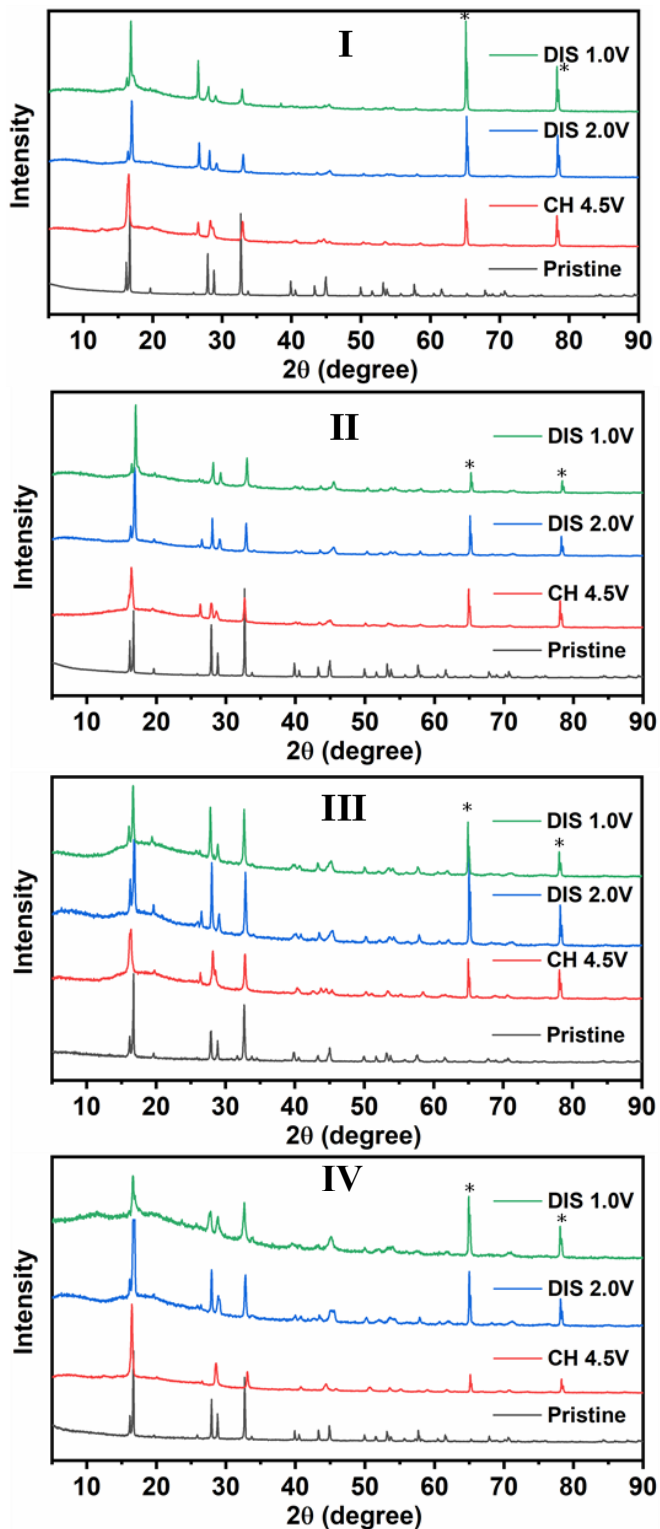

**Fig. S11.** PXRDs of the cathodes made of compounds, I – IV, recovered at different state of charge and discharge with respect to  $\text{Li}^+/\text{Li}$  in a Li-ion battery. The asterisks indicate diffraction lines from the Al-current collector.

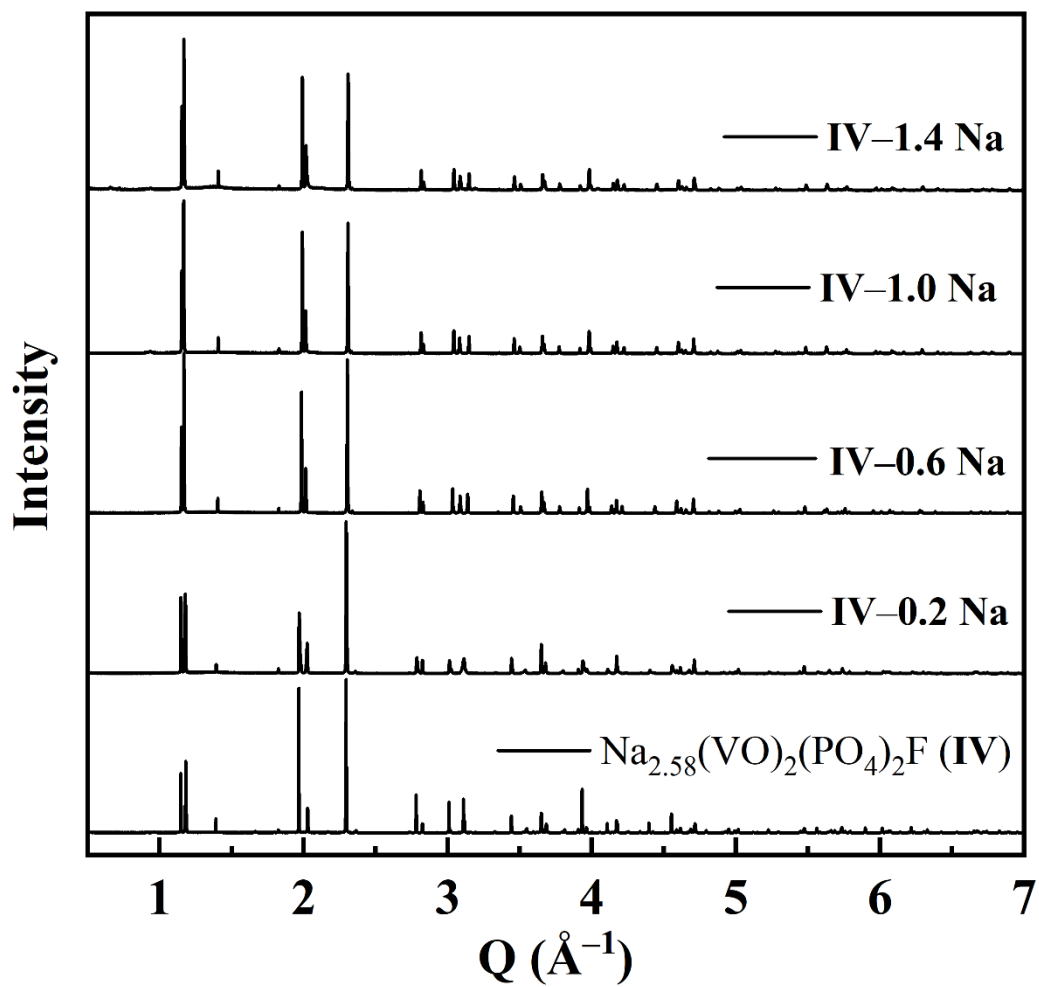

**Fig. S12.** Synchrotron PXRDs of the pristine compound, **IV** and its chemically oxidized forms with increasing ratios of oxidizing agent,  $\text{NO}_2\text{BF}_4$ , as described in the main text.

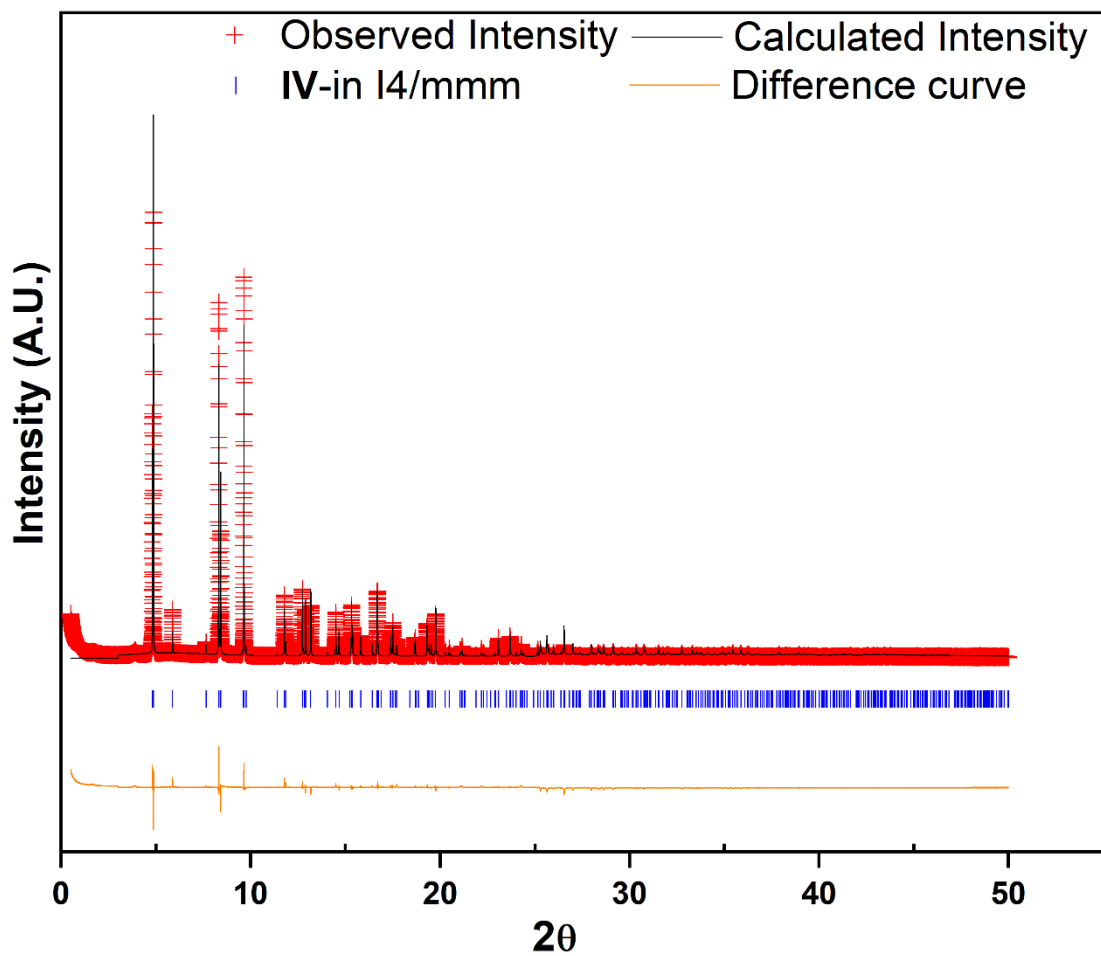

**Fig. S13.** Rietveld refinement of S-PXRD data of the oxidized sample of **IV**, referred as **IV-1.0** (see main text) showing the observed, calculated, and difference curve along with reflection ticks for the model crystal structure.  $\lambda = 0.458092 \text{ \AA}$ ,  $R_f = 0.108$ ,  $W_R (\text{Prof}) = 0.162$ .

Table S1. Atomic coordinates and equivalent isotropic displacement parameters ( $\text{\AA}^2$ ) of **I**.

| Atom       | Wyck. | Site | S.O.F. | x/a         | y/b         | z/c        | U(eq) [ $\text{\AA}^2$ ] |
|------------|-------|------|--------|-------------|-------------|------------|--------------------------|
| <b>V1</b>  | $8j$  | ..m  | 1.0000 | 0.25071(10) | 0.25071(10) | 0.19974(8) | 0.010(1)                 |
| <b>P1</b>  | $4d$  | -4.. | 1.0000 | 0           | 1/2         | 1/4        | 0.008(1)                 |
| <b>P2</b>  | $4e$  | 2.mm | 1.0000 | 0           | 0           | 0.2473(2)  | 0.005(1)                 |
| <b>O1</b>  | $16k$ | 1    | 1.0000 | 0.0954(5)   | 0.4040(5)   | 0.1635(5)  | 0.013(1)                 |
| <b>O2</b>  | $8j$  | ..m  | 1.0000 | 0.0961(5)   | 0.0961(5)   | 0.1614(6)  | 0.015(2)                 |
| <b>O3</b>  | $8j$  | ..m  | 1.0000 | 0.4042(5)   | 0.4042(5)   | 0.1654(6)  | 0.015(2)                 |
| <b>F1</b>  | $4f$  | m.2m | 1.0000 | 0.2510(4)   | 0.2510(4)   | 0          | 0.012(1)                 |
| <b>O4</b>  | $8j$  | ..m  | 1.0000 | 0.2501(4)   | 0.2501(4)   | 0.3542(4)  | 0.022(1)                 |
| <b>Na1</b> | $8i$  | m..  | 0.6848 | 0.5179(7)   | 0.2599(13)  | 0          | 0.054(2)                 |
| <b>Na2</b> | $8i$  | m..  | 0.7912 | 0.742(1)    | 0.0134(5)   | 0          | 0.033(1)                 |

Table S2. Atomic coordinates and equivalent isotropic displacement parameters ( $\text{\AA}^2$ ) of **II**.

| Atom       | Wyck. | Site | S.O.F. | x/a        | y/b        | z/c        | U(eq) [ $\text{\AA}^2$ ] |
|------------|-------|------|--------|------------|------------|------------|--------------------------|
| <b>V1</b>  | $8j$  | ..m  | 1.000  | 0.25092(6) | 0.25092(6) | 0.19982(6) | 0.009(1)                 |
| <b>P1</b>  | $4d$  | -4.. | 1.000  | 0          | 1/2        | 1/4        | 0.007(1)                 |
| <b>P2</b>  | $4e$  | 2.mm | 1.000  | 0          | 0          | 0.2467(5)  | 0.006(1)                 |
| <b>O1</b>  | $16k$ | 1    | 1.000  | 0.0957(3)  | 0.4042(3)  | 0.1638(4)  | 0.014(1)                 |
| <b>O2</b>  | $8j$  | ..m  | 1.000  | 0.0955(3)  | 0.0955(3)  | 0.1606(4)  | 0.014(1)                 |
| <b>O3</b>  | $8j$  | ..m  | 1.000  | 0.4041(3)  | 0.4041(3)  | 0.1659(5)  | 0.014(1)                 |
| <b>F1</b>  | $4f$  | m.2m | 1.000  | 0.2515(3)  | 0.2515(3)  | 0          | 0.011(1)                 |
| <b>O4</b>  | $8j$  | ..m  | 1.000  | 0.2507(3)  | 0.2507(3)  | 0.3538(3)  | 0.020(1)                 |
| <b>Na1</b> | $8i$  | m..  | 0.6332 | 0.5170(5)  | 0.2671(8)  | 0          | 0.047(2)                 |
| <b>Na2</b> | $8i$  | m..  | 0.832  | 0.7397(5)  | 0.0123(3)  | 0          | 0.030(1)                 |

Table S3. Atomic coordinates and equivalent isotropic displacement parameters ( $\text{\AA}^2$ ) of **III**.

| Atom       | Wyck. | Site | S.O.F. | x/a        | y/b         | z/c         | U(eq) [ $\text{\AA}^2$ ] |
|------------|-------|------|--------|------------|-------------|-------------|--------------------------|
| <b>V1</b>  | 8g    | ..m  | 1.00   | 1/4        | 0.2498(3)   | 0.19969(10) | 0.009(1)                 |
| <b>P1</b>  | 8e    | 2..  | 1.00   | 0          | 0           | 0.2501(4)   | 0.007(1)                 |
| <b>F1</b>  | 4c    | m2m  | 1.00   | 1/4        | 0.2517(10)  | 0           | 0.011(1)                 |
| <b>O1</b>  | 16h   | 1    | 1.00   | 0.0946(5)  | 0.4036(5)   | 0.1629(5)   | 0.013(1)                 |
| <b>O2</b>  | 16h   | 1    | 1.00   | 0.0973(6)  | 0.0959(6)   | 0.1636(5)   | 0.014(1)                 |
| <b>O3</b>  | 8g    | ..m  | 1.00   | 1/4        | 0.2511(10)  | 0.3531(4)   | 0.021(1)                 |
| <b>Na1</b> | 4c    | m2m  | 0.8    | 1/4        | -0.0218(10) | 0           | 0.042(3)                 |
| <b>Na2</b> | 4c    | m2m  | 0.68   | 1/4        | 0.5069(10)  | 0           | 0.030(3)                 |
| <b>Na3</b> | 8f    | m..  | 0.76   | -0.0151(5) | 0.2441(12)  | 0           | 0.040(1)                 |

Table S4. Atomic coordinates and equivalent isotropic displacement parameters ( $\text{\AA}^2$ ) of **IV**.

| Atom       | Wyck. | Site | S.O.F. | x/a        | y/b        | z/c         | U(eq) [ $\text{\AA}^2$ ] |
|------------|-------|------|--------|------------|------------|-------------|--------------------------|
| <b>V1</b>  | 8j    | ..m  |        | 0.25053(6) | 0.25053(6) | 0.19709(7)  | 0.009(1)                 |
| <b>P1</b>  | 4d    | -4.. |        | 0          | 1/2        | 1/4         | 0.005(1)                 |
| <b>P2</b>  | 4e    | 2.mm |        | 0          | 0          | 0.24895(15) | 0.005(1)                 |
| <b>O1</b>  | 16k   | 1    |        | 0.0960(3)  | 0.4043(3)  | 0.1641(2)   | 0.012(1)                 |
| <b>O2</b>  | 8j    | ..m  |        | 0.0959(2)  | 0.0959(2)  | 0.1635(3)   | 0.014(1)                 |
| <b>O3</b>  | 8j    | ..m  |        | 0.4043(3)  | 0.4043(3)  | 0.1652(3)   | 0.015(1)                 |
| <b>F1</b>  | 4f    | m.2m |        | 0.2507(3)  | 0.2507(3)  | 0           | 0.011(1)                 |
| <b>O4</b>  | 8j    | ..m  |        | 0.2506(3)  | 0.2506(3)  | 0.3533(4)   | 0.022(1)                 |
| <b>Na1</b> | 8i    | m..  | 0.646  | 0.5221(5)  | 0.2554(5)  | 0           | 0.042(1)                 |
| <b>Na2</b> | 8i    | m..  | 0.646  | 0.7487(5)  | 0.0204(5)  | 0           | 0.036(1)                 |

Table S5. Selected interatomic distances of **I** – **IV** from single-crystal structure solutions.

| <i>P4<sub>2</sub>/mnm</i>         | <b>I</b>      | <b>II</b>    | <b>IV</b>     | <i>Amam</i>                    | <b>III</b>    |
|-----------------------------------|---------------|--------------|---------------|--------------------------------|---------------|
| V 1 – O4                          | 1.642(4)      | 1.636(3)     | 1.666(5)      | V1 – O3                        | 1.620(5)      |
| V1 – O3                           | 1.998(6)      | 1.992(4)     | 1.994(4)      | 2 x V1 – O2 <sup>#1</sup>      | 1.993(5)      |
| 2 x V1 – O1 <sup>#1</sup>         | 2.012(5)      | 2.010(3)     | 2.002(2)      | 2 x V1 – O1 <sup>#1</sup>      | 2.011(5)      |
| V1 – O2                           | 2.019(6)      | 2.031(4)     | 2.009(3)      | V1 – F1                        | 2.109(3)      |
| V1 – F1                           | 2.1232(8)     | 2.1224(7)    | 2.1022(8)     | <b>BVS sum</b>                 | <b>4.1185</b> |
| <b>BVS sum</b>                    | <b>3.9668</b> | <b>3.989</b> | <b>3.9433</b> | 2 x P1 – O1 <sup>#2, #3</sup>  | 1.526(6)      |
| 4 x P1 – O1 <sup>#5, #6, #7</sup> | 1.531(5)      | 1.529(4)     | 1.529(2)      | 2 x P1 – O2 <sup>#4</sup>      | 1.535(6)      |
| 2 x P2 – O2 <sup>#9</sup>         | 1.532(7)      | 1.526(4)     | 1.528(3)      | 4 x Na1 – O2                   | 2.452(7)      |
| 2 x P2 – O3 <sup>#7, #10</sup>    | 1.536(7)      | 1.539(4)     | 1.529(3)      | 2 x Na1 – O3 <sup>#5</sup>     | 2.570(6)      |
| 2 x Na1 – O1 <sup>#4</sup>        | 2.509(9)      | 2.543(6)     | 2.505(4)      | Na1 – F1                       | 2.470(5)      |
| 2 x Na1 – O3 <sup>#4</sup>        | 2.419(9)      | 2.384(5)     | 2.460(4)      | 4 x Na2 – O1                   | 2.408(6)      |
| 2 x Na1 – O4 <sup>#8, #11</sup>   | 2.612(6)      | 2.627(5)     | 2.592(5)      | 2 x Na2 – O3 <sup>#7</sup>     | 2.696(9)      |
| Na1 – F1                          | 2.416(7)      | 2.406(5)     | 2.453(6)      | Na2 – F1                       | 2.304(13)     |
| 2 x Na2 – O1 <sup>#2</sup>        | 2.394(7)      | 2.383(4)     | 2.467(4)      | 2 x Na3 – O1                   | 2.452(9)      |
| 2 x Na2 – O2 <sup>#2, #3</sup>    | 2.463(8)      | 2.466(4)     | 2.474(4)      | 2 x Na3 – O2                   | 2.409(8)      |
| 2 x Na2 – O4 <sup>#8, #11</sup>   | 2.642(5)      | 2.649(4)     | 2.595(5)      | 2 x Na3 – O3 <sup>#3, #6</sup> | 2.628(5)      |
| Na2 – F1 <sup>#2</sup>            | 2.392(5)      | 2.387(4)     | 2.451(5)      | Na3 – F1                       | 2.393(5)      |

**Symmetry transformations used to generate equivalent atoms:**For **I**, **II**, and **IV**:

#1  $y, x, z$ ; #2  $-y, -x+1, z$ ; #3  $-x+1, -y, -z$ ; #4  $y, x, -z$ ; #5  $-y+1/2, x+1/2, -z+1/2$ ; #6  $-x, -y+1, z$ ; #7  $y-1/2, -x+1/2, -z+1/2$ ; #8  $x-1/2, -y+1/2, z+1/2$ ; #9  $-x, -y, z$ ; #10  $-y+1/2, x-1/2, -z+1/2$ ; #11  $-y+1/2, x-1/2, z+1/2$ .

For **III**: #1  $-x+1/2, y, z$ ; #2  $x, y-1/2, -z+1/2$ ; #3  $-x, -y+1/2, -z+1/2$ ; #4  $-x, -y, z$ ; #5  $x, y+1/2, z+1/2$ ; #6  $x+1/2, -y+1/2, -z+1/2$ ; #7  $x, y-1/2, z+1/2$ .

Table S6. Refined lattice constants and final Rietveld refinement parameters from the synchrotron powder XRD for the four compounds.

| Compounds                            | I                                                                       | II                                                                      | III                                                                    | IV                                                                      |
|--------------------------------------|-------------------------------------------------------------------------|-------------------------------------------------------------------------|------------------------------------------------------------------------|-------------------------------------------------------------------------|
| <b>Empirical formula</b>             | Na <sub>2.922</sub> (VO) <sub>2</sub> (PO <sub>4</sub> ) <sub>2</sub> F | Na <sub>2.939</sub> (VO) <sub>2</sub> (PO <sub>4</sub> ) <sub>2</sub> F | Na <sub>2.97</sub> (VO) <sub>2</sub> (PO <sub>4</sub> ) <sub>2</sub> F | Na <sub>2.646</sub> (VO) <sub>2</sub> (PO <sub>4</sub> ) <sub>2</sub> F |
| <b>Formula weight</b>                | 410.60                                                                  | 410.4                                                                   | 411.09                                                                 | 403.66                                                                  |
| <b>Temperature(K)</b>                | 295                                                                     | 295                                                                     | 300                                                                    | 300                                                                     |
| <b>Wavelength (Å)</b>                | 0.45790                                                                 | 0.45787                                                                 | 0.45973                                                                | 0.41283                                                                 |
| <b>Crystal system</b>                | Tetragonal                                                              | Tetragonal                                                              | Orthorhombic                                                           | Tetragonal                                                              |
| <b>Space group</b>                   | <i>P4<sub>2</sub>/mnm</i>                                               | <i>P4<sub>2</sub>/mnm</i>                                               | <i>Amam</i>                                                            | <i>P4<sub>2</sub>/mnm</i>                                               |
| <i>a</i> /Å                          | 9.039058(12)                                                            | 9.043427                                                                | 9.03613(4)                                                             | 9.03466                                                                 |
| <i>b</i> /Å                          | 9.039058(12)                                                            | 9.043427                                                                | 9.04909(5)                                                             | 9.03466                                                                 |
| <i>c</i> /Å                          | 10.623426(18)                                                           | 10.616009                                                               | 10.61623(3)                                                            | 10.62553                                                                |
| <b>Volume/ Å<sup>3</sup></b>         | 867.9824(30)                                                            | 868.215                                                                 | 868.075(6)                                                             | 867.312                                                                 |
| <b>Z</b>                             | 4                                                                       | 4                                                                       | 4                                                                      | 4                                                                       |
| <b>Density (calculated)</b>          | 3.1374 Mg/m <sup>3</sup>                                                | 3.1397 Mg/m <sup>3</sup>                                                | 3.1455 Mg/m <sup>3</sup>                                               | 3.0913 Mg/m <sup>3</sup>                                                |
| <b>Number of reflections</b>         | 1578                                                                    | 1580                                                                    | 1537                                                                   | 2135                                                                    |
| <b>R<sub>f</sub><sup>2</sup> (%)</b> | 0.05659                                                                 | 0.06933                                                                 | 0.09062                                                                | 0.0734                                                                  |
| <b>R<sub>w</sub> (%)</b>             | 0.09577                                                                 | 0.13301                                                                 | 0.16401                                                                | 0.13974                                                                 |
| <b>V = O Å</b>                       | 1.620                                                                   | 1.618                                                                   | 1.611                                                                  | 1.632                                                                   |

Table S7. Atomic coordinates and equivalent isotropic displacement parameters (Å<sup>2</sup>) of I.

| Atom | Wyck. | Site | S.O.F. | x/a     | y/b     | z/c     | U(eq) [Å <sup>2</sup> ] |
|------|-------|------|--------|---------|---------|---------|-------------------------|
| V1   | 8j    | ..m  | 1.00   | 0.25014 | 0.25014 | 0.19937 | 0.0093                  |
| P1   | 4d    | -4.. | 1.00   | 0       | 1/2     | 1/4     | 0.0087                  |
| P2   | 4e    | 2.mm | 1.00   | 0       | 0       | 0.24654 | 0.0034                  |
| O1   | 16k   | 1    | 1.00   | 0.09421 | 0.40548 | 0.16299 | 0.0069                  |
| O2   | 8j    | ..m  | 1.00   | 0.09605 | 0.09605 | 0.16286 | 0.0132                  |
| O3   | 8j    | ..m  | 1.00   | 0.40353 | 0.40353 | 1/6     | 0.0091                  |
| F1   | 4f    | m.2m | 1.00   | 0.25250 | 0.25250 | 0       | 0.0084                  |
| O4   | 8j    | ..m  | 1.00   | 0.25059 | 0.25059 | 0.35163 | 0.0173                  |
| Na1  | 8i    | m..  | 0.6462 | 0.52176 | 0.27867 | 0       | 0.0201                  |
| Na2  | 8i    | m..  | 0.8145 | 0.74448 | 0.01253 | 0       | 0.0428                  |

Table S8. Atomic coordinates and equivalent isotropic displacement parameters ( $\text{\AA}^2$ ) of **II**.

| <b>Atom</b> | <b>Wyck.</b> | <b>Site</b> | <b>S.O.F.</b> | <b>x/a</b> | <b>y/b</b> | <b>z/c</b> | <b>U(eq) [<math>\text{\AA}^2</math>]</b> |
|-------------|--------------|-------------|---------------|------------|------------|------------|------------------------------------------|
| <b>V1</b>   | 8j           | ..m         | 1.00          | 0.25049    | 0.25049    | 0.19958    | 0.0092                                   |
| <b>P1</b>   | 4d           | -4..        | 1.00          | 0          | 1/2        | 1/4        | 0.0098                                   |
| <b>P2</b>   | 4e           | 2.mm        | 1.00          | 0          | 0          | 0.24619    | 0.0031                                   |
| <b>O1</b>   | 16k          | 1           | 1.00          | 0.09484    | 0.40586    | 0.16369    | 0.0088                                   |
| <b>O2</b>   | 8j           | ..m         | 1.00          | 0.09729    | 0.09729    | 0.16543    | 0.0062                                   |
| <b>O3</b>   | 8j           | ..m         | 1.00          | 0.40354    | 0.40354    | 0.16409    | 0.0155                                   |
| <b>F1</b>   | 4f           | m.2m        | 1.00          | 0.25181    | 0.25181    | 0          | 0.0088                                   |
| <b>O4</b>   | 8j           | ..m         | 1.00          | 0.25051    | 0.25051    | 0.35201    | 0.0200                                   |
| <b>Na1</b>  | 8i           | m..         | 0.636         | 0.52262    | 0.27842    | 0          | 0.0119                                   |
| <b>Na2</b>  | 8i           | m..         | 0.8336        | 0.74699    | 0.01080    | 0          | 0.0446                                   |

Table S9. Atomic coordinates and equivalent isotropic displacement parameters ( $\text{\AA}^2$ ) of **III**.

| <b>Atom</b> | <b>Wyck.</b> | <b>Site</b> | <b>S.O.F.</b> | <b>x/a</b> | <b>y/b</b> | <b>z/c</b> | <b>U(eq) [<math>\text{\AA}^2</math>]</b> |
|-------------|--------------|-------------|---------------|------------|------------|------------|------------------------------------------|
| <b>V1</b>   | 8g           | ..m         | 1.00          | 0.25000    | 0.24763    | 0.19959    | 0.0088                                   |
| <b>P1</b>   | 8e           | 2..         | 1.00          | 0.00000    | 0.00000    | 0.25584    | 0.0063                                   |
| <b>F1</b>   | 4c           | m2m         | 1.00          | 0.25000    | 0.24306    | 0.00000    | 0.0097                                   |
| <b>O1</b>   | 16h          | 1           | 1.00          | 0.09029    | 0.40793    | 0.16114    | 0.0112                                   |
| <b>O2</b>   | 16h          | 1           | 1.00          | 0.10052    | 0.09785    | 0.16596    | 0.0094                                   |
| <b>O3</b>   | 8g           | ..m         | 1.00          | 0.25000    | 0.26302    | 0.35081    | 0.0143                                   |
| <b>Na1</b>  | 4c           | m2m         | 0.8162        | 0.25000    | -0.01565   | 0.00000    | 0.0689                                   |
| <b>Na2</b>  | 4c           | m2m         | 0.6648        | 0.25000    | 0.51652    | 0.00000    | 0.0268                                   |
| <b>Na3</b>  | 8f           | m..         | 0.7442        | -0.01607   | 0.23120    | 0.00000    | 0.0337                                   |

Table S10. Atomic coordinates and equivalent isotropic displacement parameters ( $\text{\AA}^2$ ) of **IV**.

| <b>Atom</b> | <b>Wyck.</b> | <b>Site</b> | <b>S.O.F.</b> | <b>x/a</b> | <b>y/b</b> | <b>z/c</b> | <b>U(eq) [<math>\text{\AA}^2</math>]</b> |
|-------------|--------------|-------------|---------------|------------|------------|------------|------------------------------------------|
| <b>V1</b>   | 8j           | ..m         | 1.00          | 0.25069    | 0.25069    | 0.19879    | 0.0092                                   |
| <b>P1</b>   | 4d           | -4..        | 1.00          | 0          | 1/2        | 1/4        | 0.0065                                   |
| <b>P2</b>   | 4e           | 2.mm        | 1.00          | 0          | 0          | 0.24143    | 0.0040                                   |
| <b>O1</b>   | 16k          | 1           | 1.00          | 0.09401    | 0.40421    | 0.16289    | 0.0092                                   |
| <b>O2</b>   | 8j           | ..m         | 1.00          | 0.09347    | 0.09347    | 0.16361    | 0.0120                                   |
| <b>O3</b>   | 8j           | ..m         | 1.00          | 0.40263    | 0.40263    | 0.16481    | 0.0107                                   |
| <b>F1</b>   | 4f           | m.2m        | 1.00          | 0.25810    | 0.25810    | 0          | 0.0063                                   |
| <b>O4</b>   | 8j           | ..m         | 1.00          | 0.23884    | 0.23884    | 0.35119    | 0.0115                                   |
| <b>Na1</b>  | 8i           | m..         | 0.6883        | 0.51912    | 0.27051    | 0          | 0.0261                                   |
| <b>Na2</b>  | 8i           | m..         | 0.6348        | 0.74883    | 0.02053    | 0          | 0.0316                                   |

Table S11. Inter-atomic distances of **I** – **IV** generated from the Rietveld refinement.

| <i>P4<sub>2</sub>/mnm</i> | <b>I</b> | <b>II</b> | <b>IV</b> | <i>Amam</i>  | <b>III</b> |
|---------------------------|----------|-----------|-----------|--------------|------------|
| V 1 – O4                  | 1.621(4) | 1.618(3)  | 1.632(5)  | V1 – O3      | 1.611(3)   |
| V1 – O3                   | 1.992(4) | 1.993(6)  | 1.974(4)  | 2 x V1 – O2  | 1.946(4)   |
| 2 x V1 – O                | 2.026(4) | 2.025(2)  | 2.0182(4) | 2 x V1 – O1  | 2.086(6)   |
| V1 – O2                   | 2.007(7) | 1.993(4)  | 2.009(3)  | V1 – F1      | 2.119(4)   |
| V1 – F1                   | 2.118(6) | 2.118(6)  | 2.1144(8) | 2 x P1 – O1  | 1.462(4)   |
| 4 x P1 – O1               | 1.519(4) | 1.516(5)  | 1.525(2)  | 2 x P1 – O2  | 1.587(7)   |
| 2 x P2 – O2               | 1.516(8) | 1.511(4)  | 1.4526(5) | 4 x Na1 – O2 | 2.446(6)   |
| 2 x P2 – O3               | 1.542(6) | 1.558(4)  | 1.5938(7) | 2 x Na1 – O3 | 2.553(2)   |
| 2 x Na1 – O1              | 2.623(8) | 2.625(5)  | 2.572(3)  | Na1 – F1     | 2.341(5)   |
| 2 x Na1 – O3              | 2.353(8) | 2.339(7)  | 2.366(3)  | 4 x Na2 – O1 | 2.444(6)   |
| 2 x Na1 – O4              | 2.614(7) | 2.605(6)  | 2.539(6)  | 2 x Na2 – O3 | 2.735(9)   |
| Na1 – F1                  | 2.445(6) | 2.460(5)  | 2.361(5)  | Na2 – F1     | 2.474(3)   |
| 2 x Na2 – O1              | 2.401(6) | 2.417(6)  | 2.445(2)  | 2 x Na3 – O1 | 2.531(8)   |
| 2 x Na2 – O2              | 2.456(7) | 2.454(5)  | 2.472(3)  | 2 x Na3 – O2 | 2.381(7)   |
| 2 x Na2 – O4              | 2.659(6) | 2.669(4)  | 2.689(6)  | 2 x Na3 – O3 | 2.642(4)   |
| Na2 – F1                  | 2.395(5) | 2.375(4)  | 2.518(4)  | Na3 – F1     | 2.406(6)   |

Table S12. Inter-sodium distances in **I** – **IV** obtained from single-crystal structure solution.

|                         | <b>I</b> | <b>II</b> | <b>IV</b> |                                 | <b>III</b> |
|-------------------------|----------|-----------|-----------|---------------------------------|------------|
| Na1 – Na1 <sup>#2</sup> | 2.84(2)  | 2.76(3)   | 2.84(3)   | 2 x Na1 – Na3 <sup>#4, #5</sup> | 2.92(2)    |
| Na1 – Na2               | 3.01(3)  | 3.06(4)   | 2.95(2)   | Na1 – Na3 <sup>#3</sup>         | 3.39(3)    |
| Na1 – Na1 <sup>#1</sup> | 3.30(3)  | 3.20(2)   | 3.41(3)   | 2 x Na2 – Na3 <sup>#6, #7</sup> | 3.09(3)    |
| Na2 – Na2 <sup>#2</sup> | 3.13(3)  | 3.17(2)   | 2.95(3)   | Na2 – Na3 <sup>#3</sup>         | 3.37(2)    |

Symmetry transformations used to generate equivalent atoms:

<sup>#1</sup> y, x, -z; <sup>#2</sup> -y + 1, -x + 1, z; <sup>#3</sup> -x + 1/2, y, z; <sup>#4</sup> -x, -y, -z; <sup>#5</sup> x + 1/2, -y, -z; <sup>#6</sup> x + 1/2, -y+1, -z; <sup>#7</sup> -x, -y + 1, -z.

Table S13. Atomic coordinates and equivalent isotropic displacement parameters ( $\text{\AA}^2$ ) of **IV-1.0**.

| <b>Atom</b> | <b>Wyck.</b> | <b>Site</b> | <b>S.O.F.</b> | <b>x/a</b> | <b>y/b</b> | <b>z/c</b> | <b>U [<math>\text{\AA}^2</math>]</b> |
|-------------|--------------|-------------|---------------|------------|------------|------------|--------------------------------------|
| <b>V1</b>   | 4e           | 4mm         | 1.0           | 0          | 0          | 0.19348    | 0.0195                               |
| <b>P1</b>   | 4d           | -4m2        | 1.0           | 0          | 1/2        | 1/4        | 0.0085                               |
| <b>O1</b>   | 16n          | .m.         | 1.0           | 0          | 0.3146     | 0.1633     | 0.0185                               |
| <b>O2</b>   | 4e           | 4mm         | 1.0           | 0          | 0          | 0.3395     | 0.0156                               |
| <b>F1</b>   | 2a           | 4/mmm       | 1.0           | 0          | 0          | 0          | 0.0196                               |
| <b>Na1</b>  | 8h           | m.2m        | 0.60(2)       | 0.27113    | 0.27113    | 0          | 0.0503                               |
